# Supplementary material for: Integrated cohort of esophageal squamous cell cancer reveals genomic features underlying clinical characteristics
Source: PubMed Central journal article supplement (PMC9452532; doi:10.1038/s41467-022-32962-1), 2022-09-07
Supplement: 41467_2022_32962_MOESM1_ESM.pdf [file 41467_2022_32962_MOESM1_ESM.pdf]

# Supplementary Figure 2

**a**

Excluded Mutations  
in WGS(N)

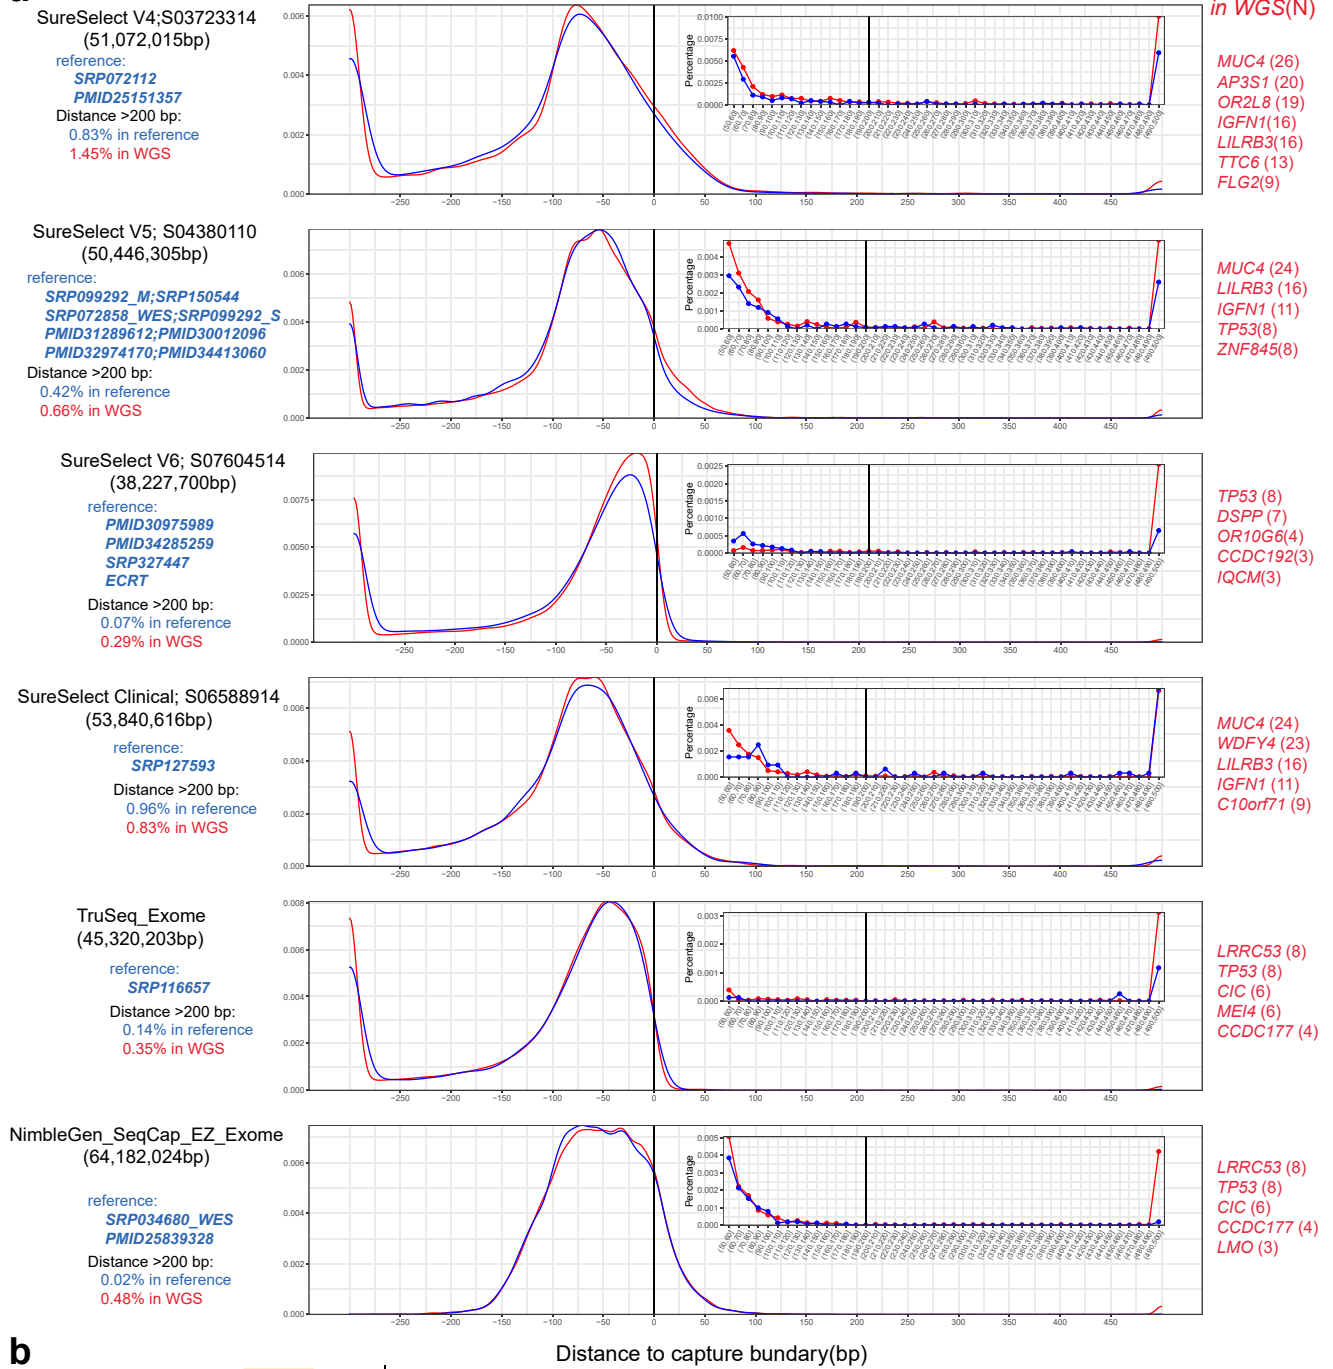

**b**

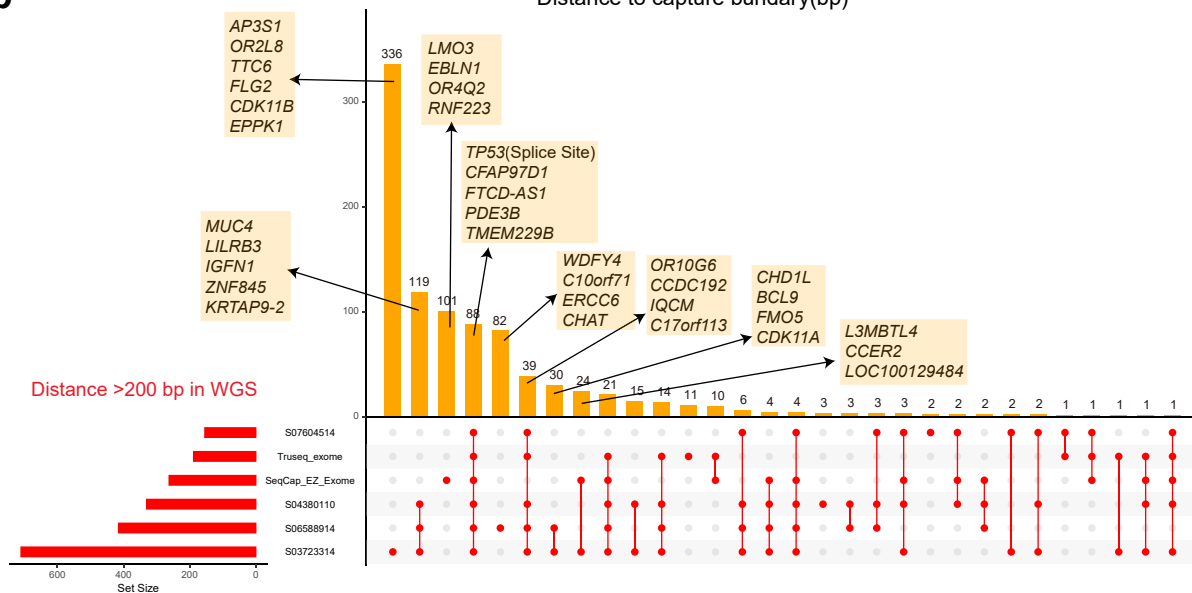

a, the distributions of the distance in reference set (blue) and testing set (red). For each non-silent SNV, the distance was defined as its locus to the nearest capture boundary. The positive value represented out of capture range of the mutational site, and the negative value represented within capture range.

b, the upset plot of the excluded mutational sites among the six capture platforms. The mainly involved genes were labelled in the orange boxes.

Source data are provided as a Source Data file.

# Supplementary Figure 3

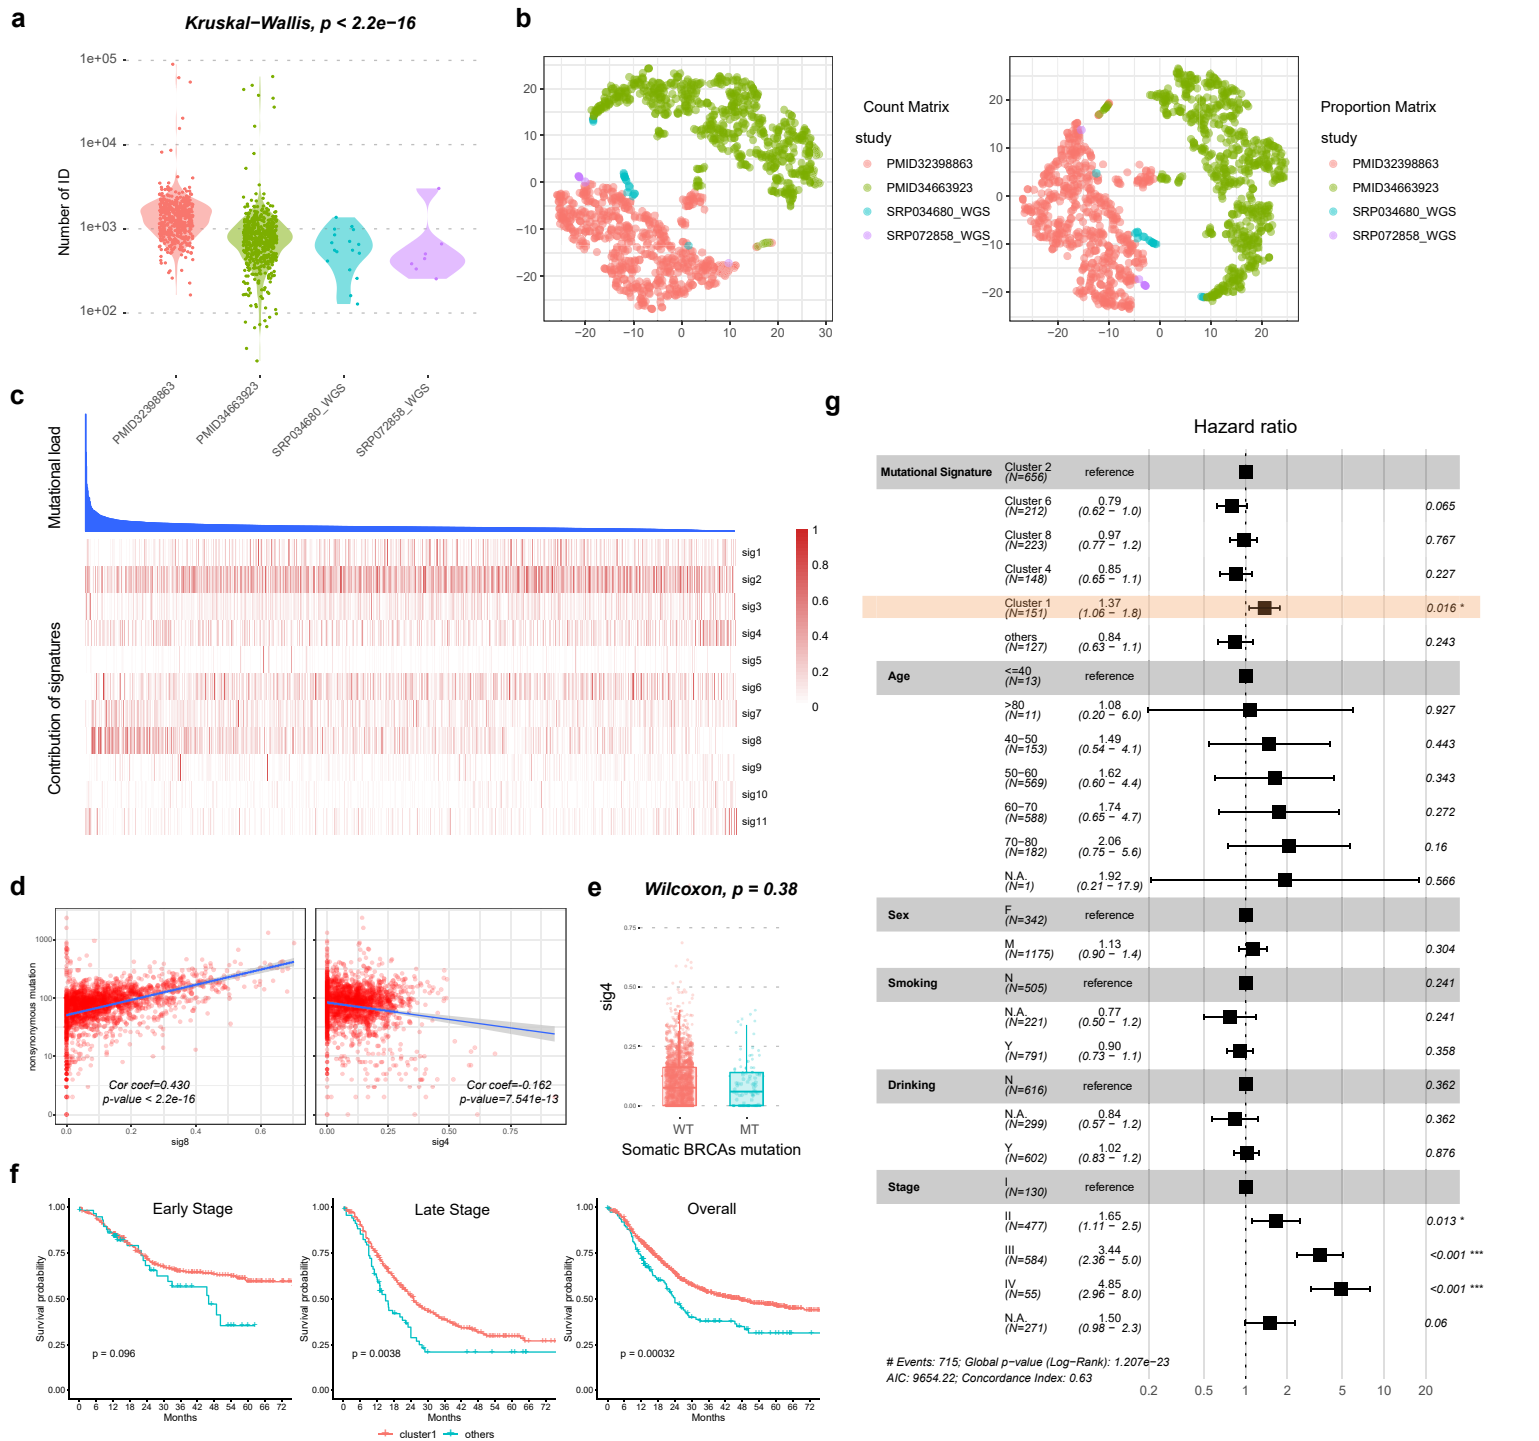

a, the distribution of total number of somatic IDs in the WGS genomes among the four datasets. The two-side Kruskal-Wallis test was used to detect the difference among datasets.

b, the t-SNE analysis of the count matrix (left) or proportion matrix (right) of the 83 ID types in all WGS samples (n=1084). The dots were colored by the dataset.

c, the heatmap of the contribution of identified 11 signatures in ESCC-MEAT cohort. The genomes were ranked by mutational load from left to right.

d, the scatter plots between the contributions of sig8 (left) or sig4 (right) and mutational load. The Pearson's correlation coefficient and its significance test were used to measure the correlation. The blue line and the grey band represent the fitted regression line and 95% confidence intervals.

e, the box plot of sig4 contributions between BRCA mutations status. The two-side Wilcoxon test was used to measure the significance. In the boxplots, the lower extreme line, lower end of box, inner line of box, upper end of box and upper extreme line represent the value of (Q1-1.5\*IQR), Q1, Q2, Q3 and (Q3+1.5\*IQR) respectively. Q1, 25th quartile; Q2, 50th quartile or the median value; Q3, 75th quartile. The interquartile range (IQR) is distance between Q1 and Q3 (Q3-Q1).

f, the overall survival curve in early (n=607) or late-stage (n=639) patients, comparing the cluster1 patients and others. The two-side log rank test was used to detect the significance.

g, the forest plot of multivariable Cox regression results. The box and arms in each line represents the HR value and 95% confidence intervals.

Source data are provided as a Source Data file.

# Supplementary Figure 4

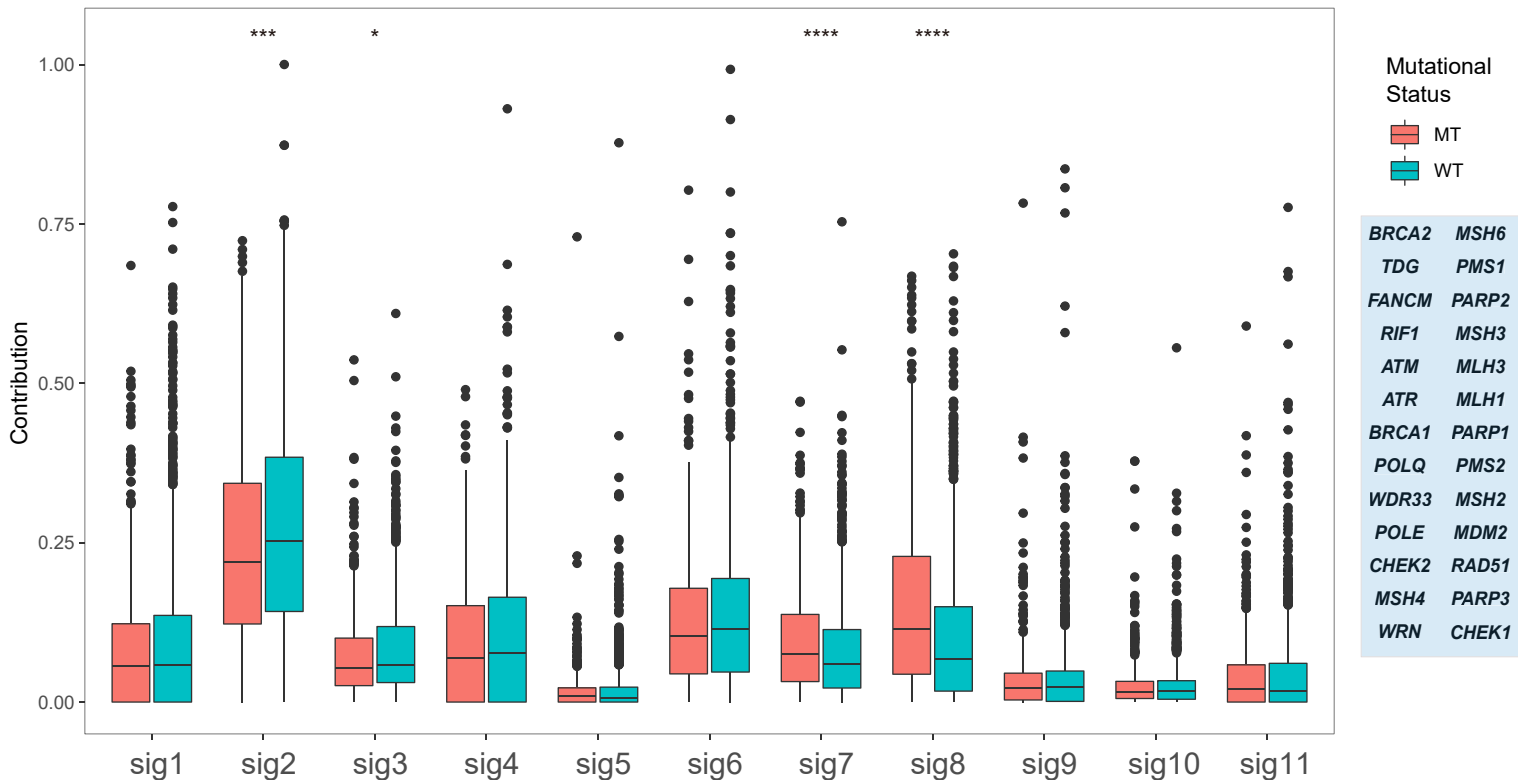

Comparison of the contribution of mutational signatures between tumors with or without mutations in DNA-repair pathway (genes listed in the right box). The p-value of two-side Wilcox test was used to measure the significance, \* indicating  $p < 0.05$ , \*\*  $p < 0.01$ , \*\*\*  $p < 0.001$ , \*\*\*\*  $p < 0.0001$ . In the boxplots, the lower extreme line, lower end of box, inner line of box, upper end of box and upper extreme line represent the value of  $(Q1-1.5*IQR)$ ,  $Q1$ ,  $Q2$ ,  $Q3$  and  $(Q3+1.5*IQR)$  respectively.  $Q1$ , 25th quartile;  $Q2$ , 50th quartile or the median value;  $Q3$ , 75th quartile. The interquartile range (IQR) is distance between  $Q1$  and  $Q3$  ( $Q3-Q1$ ). Source data are provided as a Source Data file.

# Supplementary Figure 5

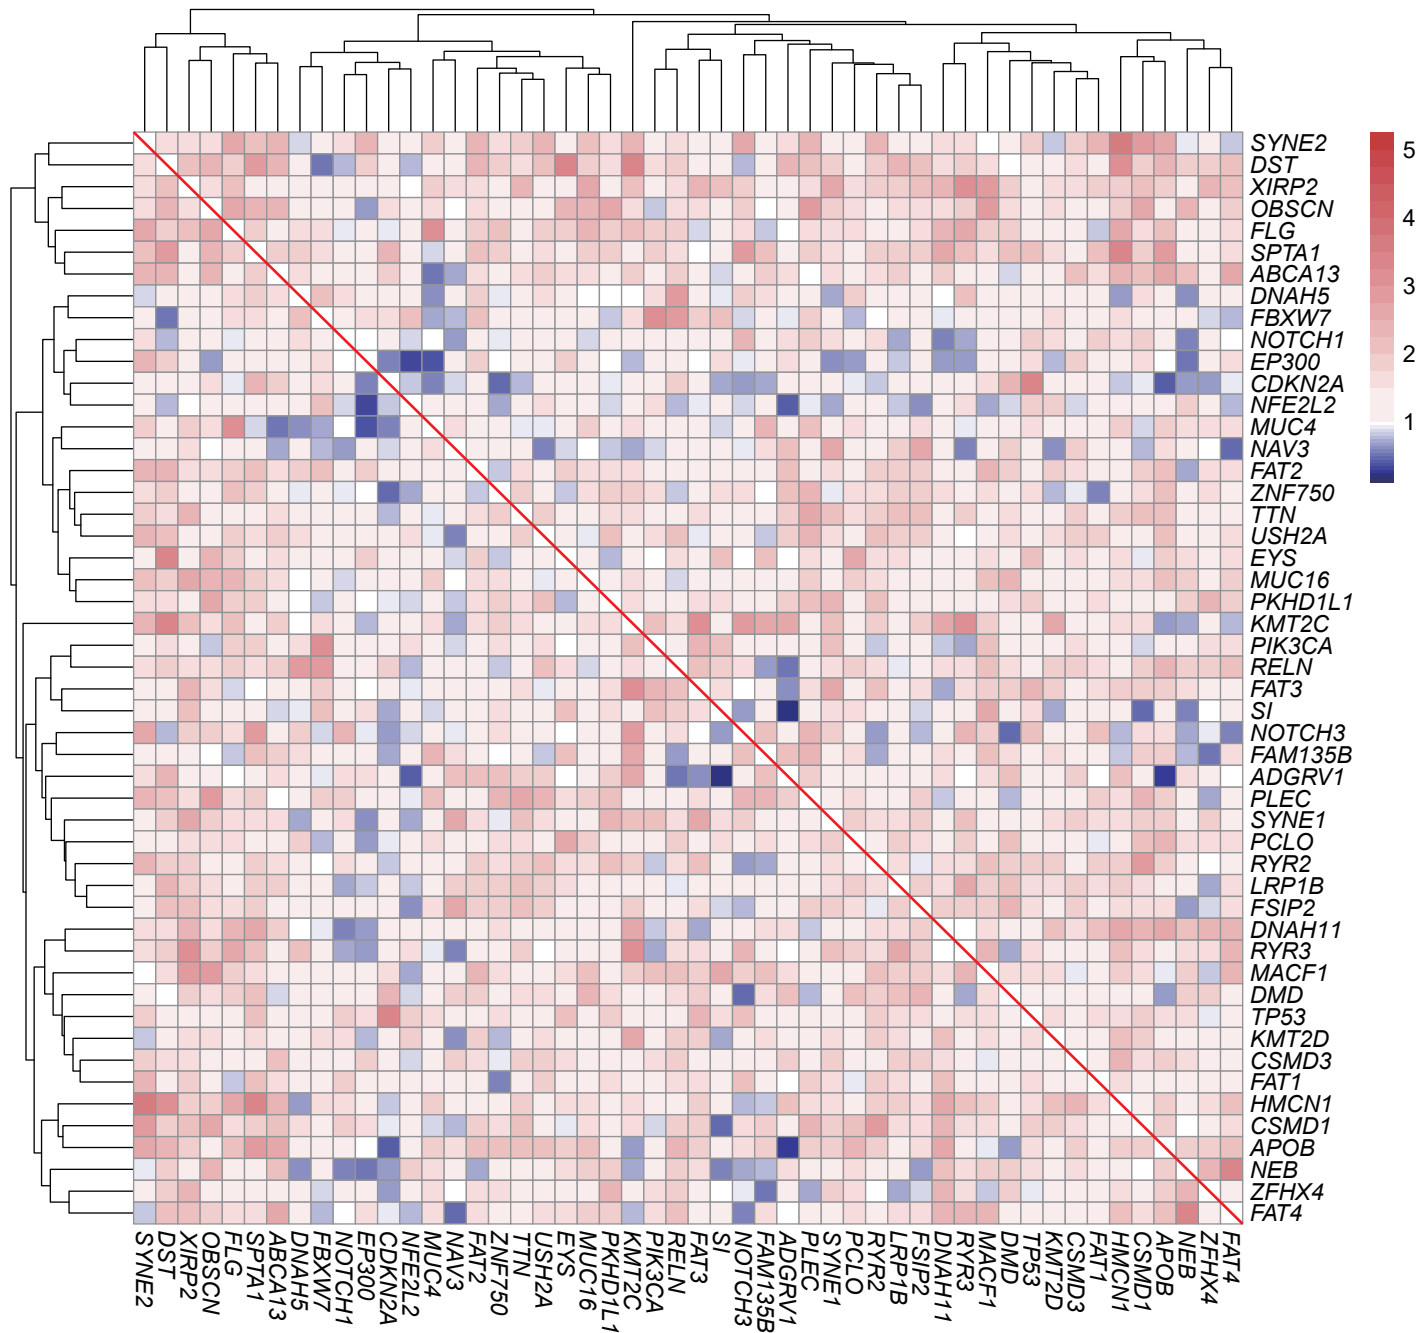

The heatmap of pairwise interactions of top 50 genes, which was indicated by the odds ratio (OR) value of the co-occurrent events. The OR > 1 (red color) indicating co-occurrence, OR < 1 (blue color) indicating mutually exclusive. Source data are provided as a Source Data file.

# Supplementary Figure 6

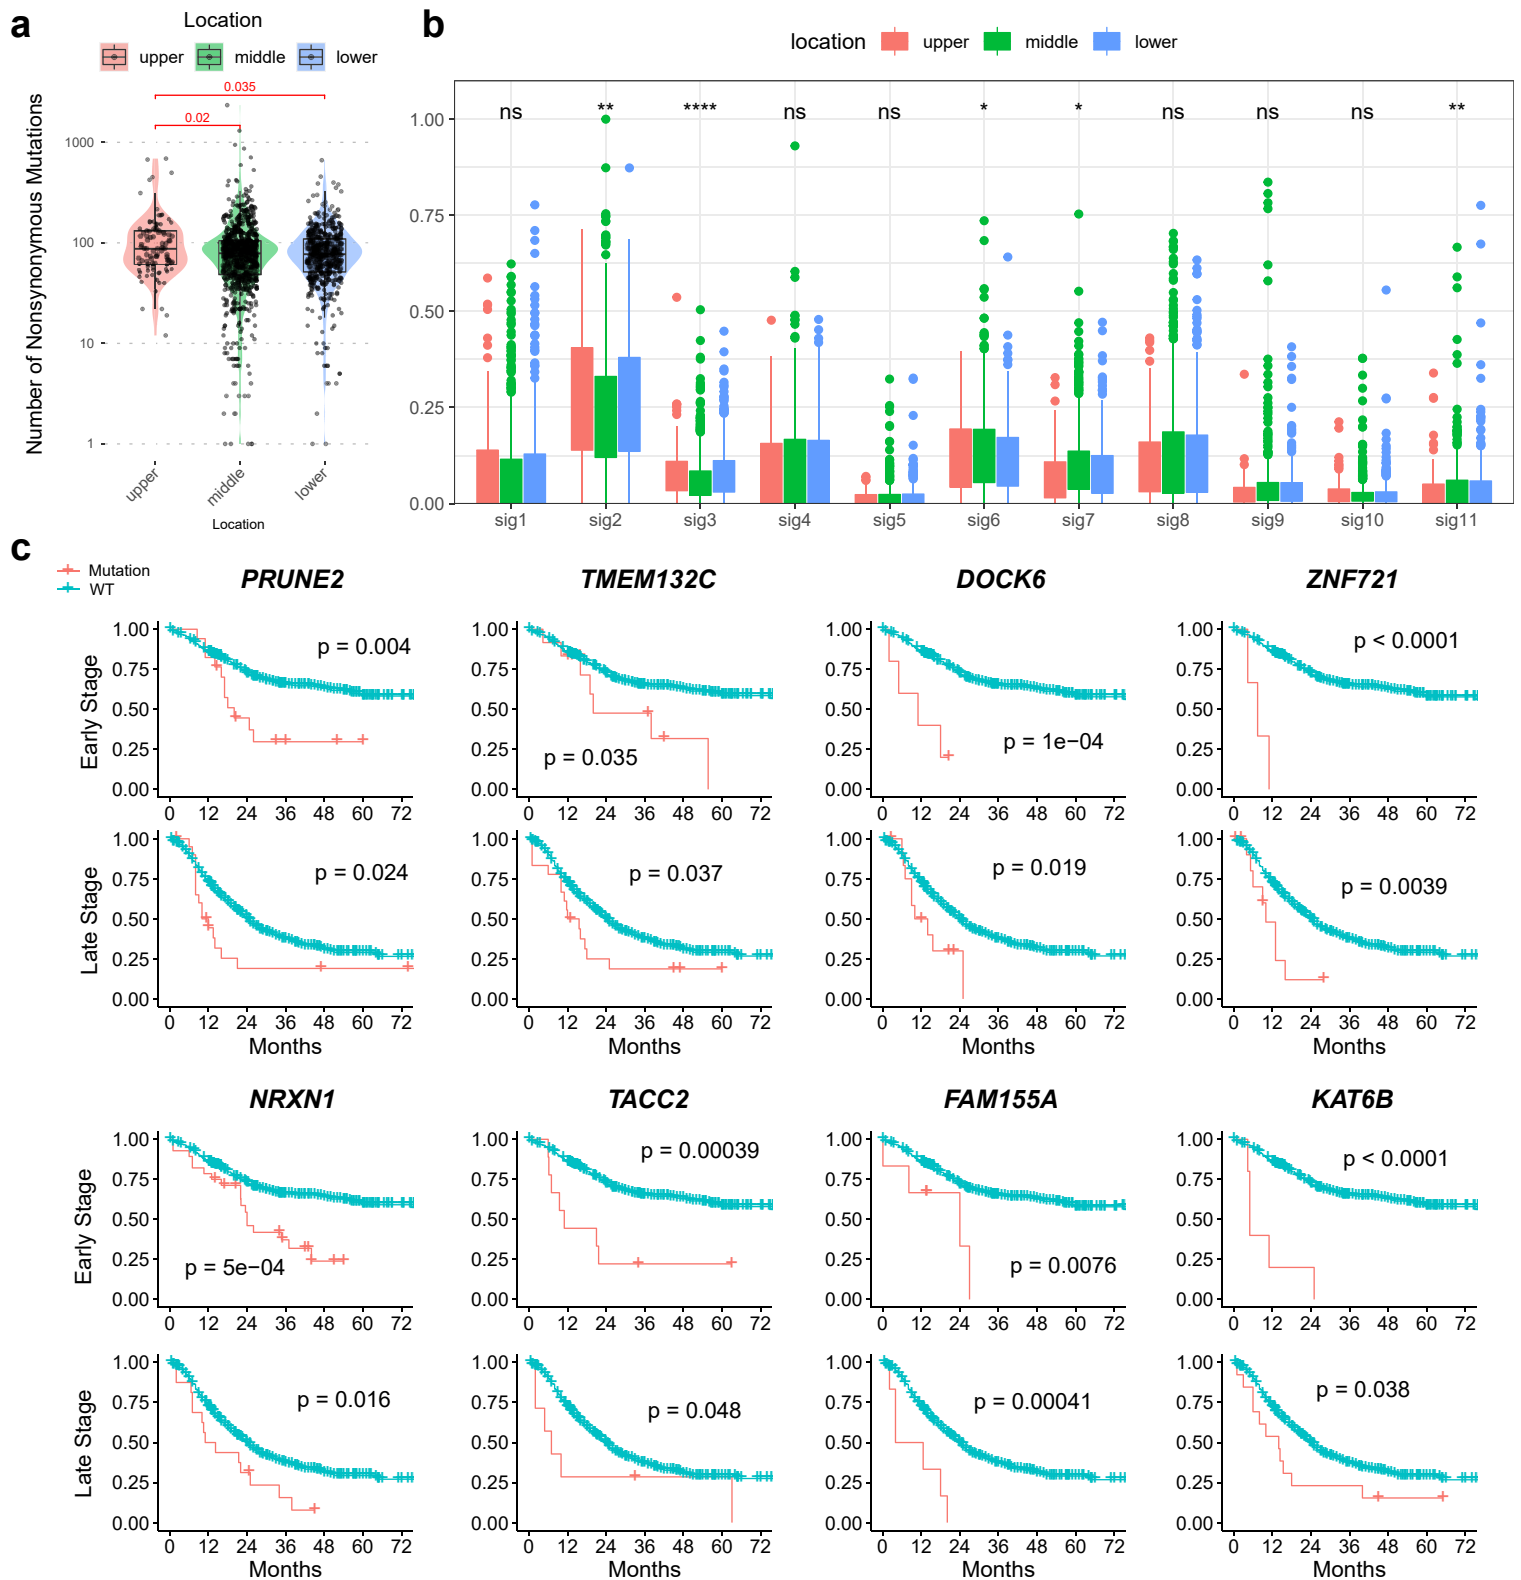

a, comparison of mutational load among different tumor locations. The p-value of two-side Wilcox test was used to measure the significance.

b, comparison of contribution of the 11 signatures among different tumor locations. The Kruskal-Wallis test was used to detect the significance, ns indicating  $p \geq 0.05$ , \* indicating  $p < 0.05$ , \*\*  $p < 0.01$ , \*\*\*  $p < 0.001$ , \*\*\*\*  $p < 0.0001$ . In the boxplots of a and b, the lower extreme line, lower end of box, inner line of box, upper end of box and upper extreme line represent the value of  $(Q1-1.5 \cdot IQR)$ ,  $Q1$ ,  $Q2$ ,  $Q3$  and  $(Q3+1.5 \cdot IQR)$  respectively.  $Q1$ , 25th quartile;  $Q2$ , 50th quartile or the median value;  $Q3$ , 75th quartile. The interquartile range (IQR) is distance between  $Q1$  and  $Q3$  ( $Q3-Q1$ ). c, survival plots of some significant genes in early or late-stage patients of ESCC-META. The two-side log rank test was used to detect the significance. Source data are provided as a Source Data file.

# Supplementary Figure 7

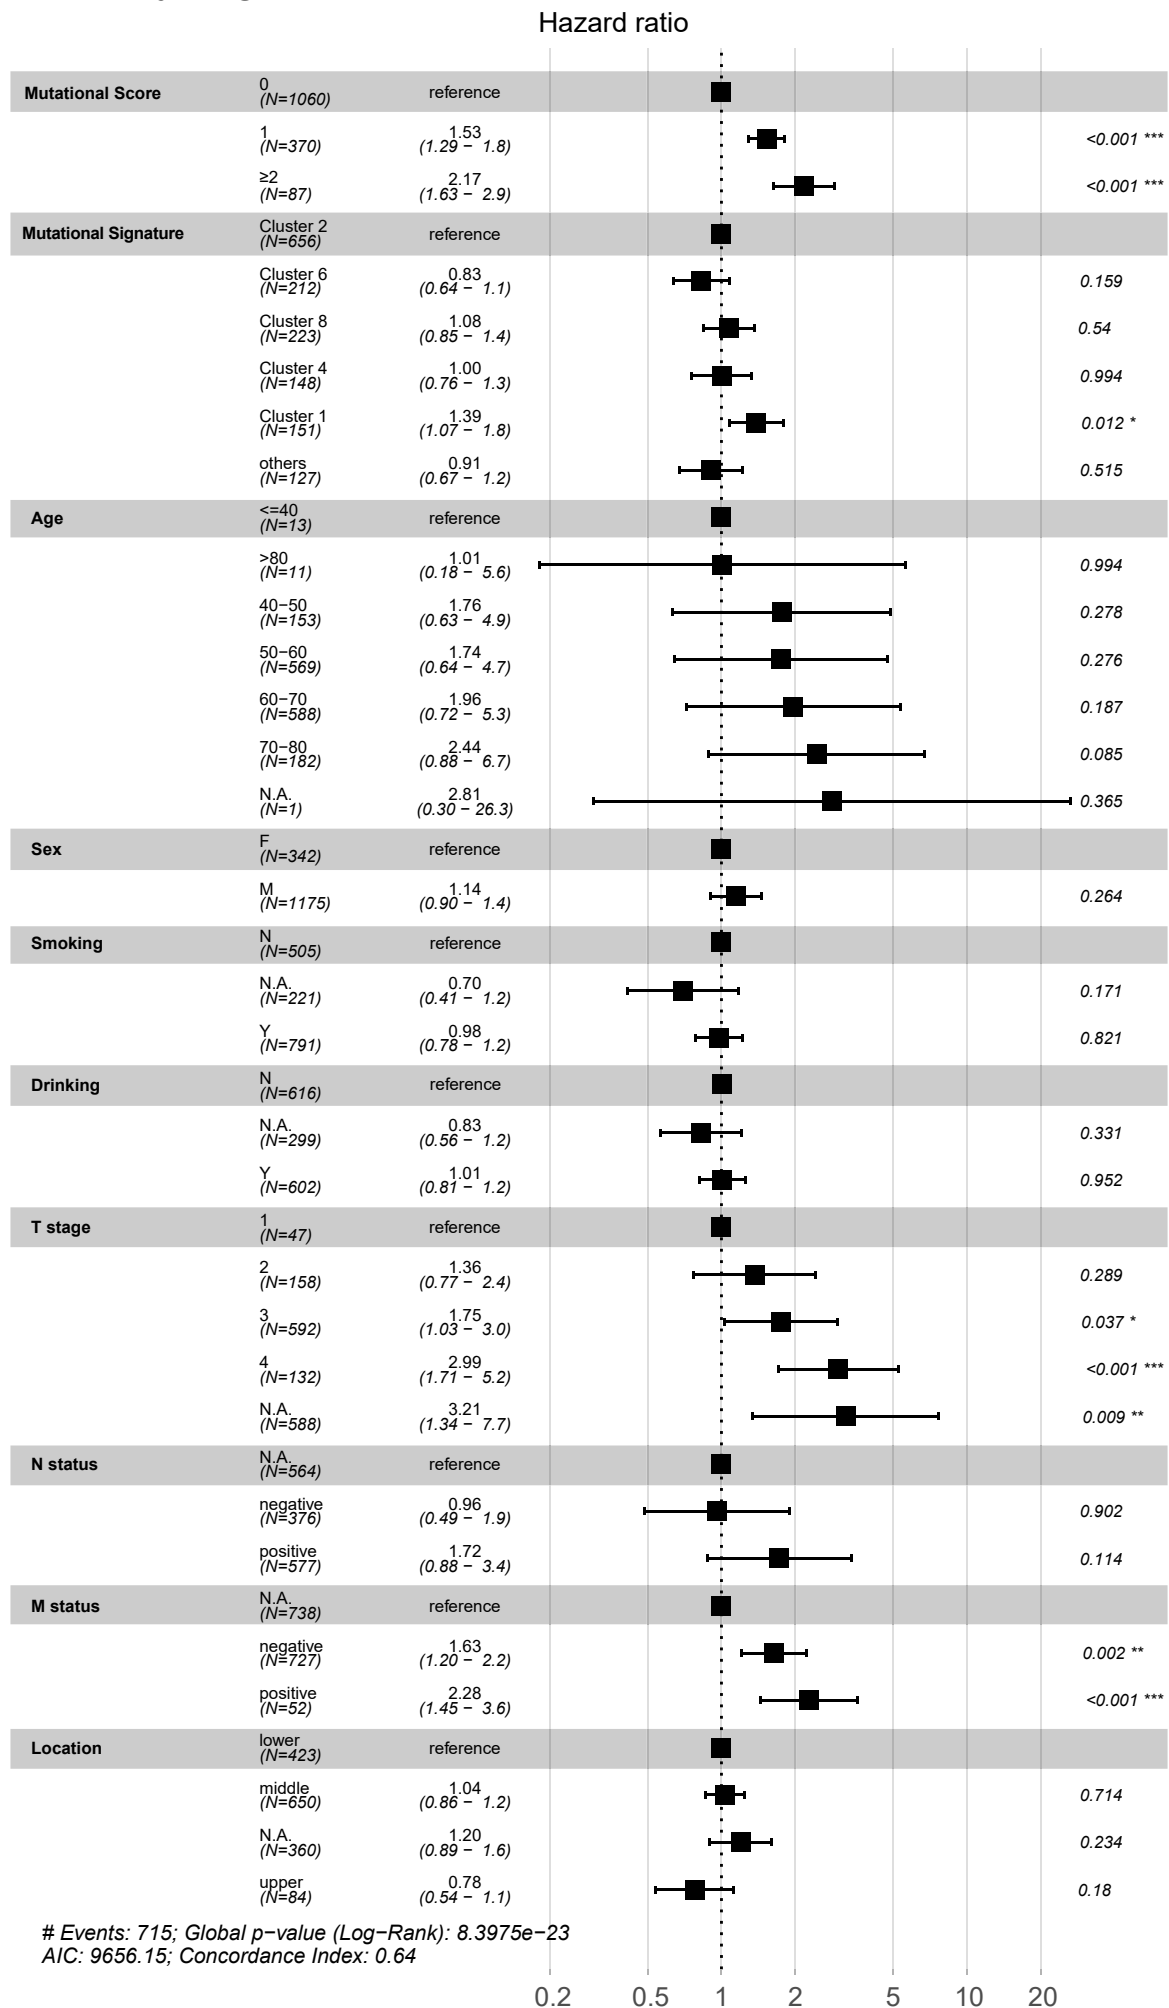

The results of multivariable Cox regression of overall survival to the mutational score and clinical factors in ESCC-META cohort. The box and arms in each line represents the HR value and 95% confidence intervals. Source data are provided as a Source Data file.

Supplementary Table 1, the 15 datasets re-analyzed from raw reads data

| <b>Dataset</b> | <b>Passed SNVs</b> | <b>Smples</b> | <b>Taget methods</b>                       |
|----------------|--------------------|---------------|--------------------------------------------|
| SRP116657      | 29422              | 78            | TruSeqExome Enrichment kit                 |
| SRP034680_WES  | 27842              | 71            | NimbleGenEZ 44M                            |
| SRP327447      | 20870              | 46            | Agilent SureSelect Human All Exon V6       |
| ECRT           | 30166              | 42            | Agilent SureSelect Human All Exon V6       |
| SRP099292_S    | 11312              | 36            | Agilent SureSelect Human All Exon V5       |
| SRP127593      | 10161              | 32            | SureSelectXT Clinical Research Exome panel |
| SRP033394      | 3599               | 19            | SureSelect Human All Exon 50M              |
| SRP072858_WES  | 8610               | 18            | Agilent SureSelect Human All ExonV5        |
| SRP034680_WGS  | 185989             | 17            | WGS                                        |
| SRP072112      | 5205               | 11            | Agilent SureSelect Human All Exon V4       |
| SRP150544      | 4712               | 10            | Agilent SureSelect Human All Exon V5       |
| SRP099292_M    | 3388               | 9             | SureSelect V5 whole exon                   |
| SRP059537      | 4051               | 9             | N.A.                                       |
| SRP179388      | 6555               | 8             | N.A.                                       |
| SRP072858_WGS  | 53988              | 7             | WGS                                        |



Supplementary Table 2, the collection of druggable genes

| <b>Mutated Gene</b> | <b>FDA Approved Drug</b> |
|---------------------|--------------------------|
| <i>BRCA1</i>        | olaparib                 |
| <i>BRCA2</i>        | olaparib                 |
| <i>EGFR</i>         | mobocertinib             |
| <i>VEGFA</i>        | bevacizumab              |
| <i>ROS1</i>         | crizotinib;entrectinib   |
| <i>ALK</i>          | crizotinib;ceritinib     |
| <i>BRAF</i>         | vemurafenib; dabrafenib  |
| <i>KRAS</i>         | sotorasib                |
| <i>NTRK1</i>        | larotrectinib            |
| <i>MET</i>          | capmatinib               |
| <i>CD274</i>        | atezolizumab; avelumab   |
| <i>RET</i>          | selpercatinib            |
| <i>ERBB2</i>        | afatinib                 |
| <i>FGFR1</i>        | erdafitinib              |

Supplementary Table 3, list of the 22 genes significantly mutated genes

| Gene           | Tx           | Total mutations | CDS length(bp) | Mutational frequency | Mutsig Q value | OncodriveCLUS T clusterScores | Mutational Density | dN/dS  |
|----------------|--------------|-----------------|----------------|----------------------|----------------|-------------------------------|--------------------|--------|
| <b>TP53</b>    | NM_000546    | 1595            | 1179           | 78.19%               | 2.98E-13       | 0.4815                        | 7009.54            | 76.90  |
| <b>NOTCH1</b>  | NM_017617    | 291             | 7665           | 15.54%               | 4.71E-14       | 0.3648                        | 196.71             | 14.95  |
| <b>KMT2D</b>   | NM_003482    | 287             | 16611          | 14.15%               | 5.22E-14       | 0.2618                        | 89.52              | 7.24   |
| <b>ZNF750</b>  | NM_024702    | 171             | 2169           | 8.24%                | 4.42E-13       | 0.3927                        | 408.49             | 20.88  |
| <b>CDKN2A</b>  | NM_000077    | 150             | 468            | 8.19%                | 0              | 0.2766                        | 1660.69            | 143.00 |
| <b>NFE2L2</b>  | NM_006164    | 152             | 1815           | 7.62%                | 3.13E-13       | 0.4492                        | 433.92             | 21.14  |
| <b>EP300</b>   | NM_001429    | 132             | 7242           | 7.15%                | 0              | 0.5401                        | 94.44              | 13.00  |
| <b>PIK3CA</b>  | NM_006218    | 139             | 3204           | 6.94%                | 1.09E-13       | 0.7301                        | 224.78             | 27.60  |
| <b>FBXW7</b>   | NM_018315    | 123             | 1881           | 6.48%                | 0              | 0.4108                        | 338.81             | 30.00  |
| <b>NOTCH3</b>  | NM_000435    | 98              | 6963           | 5.49%                | 4.61E-13       | 0.2114                        | 72.92              | 5.11   |
| <b>CREBBP</b>  | NM_001079846 | 93              | 7212           | 4.92%                | 0              | 0.2774                        | 66.81              | 7.00   |
| <b>AJUBA</b>   | NM_032876    | 74              | 1614           | 4.09%                | 0              | 0.3968                        | 237.56             | 36.50  |
| <b>RB1</b>     | NM_000321    | 62              | 2784           | 3.63%                | 0              | 0.2375                        | 115.39             | 12.00  |
| <b>PPFIA2</b>  | NM_001220473 | 64              | 3741           | 3.37%                | 6.22E-09       | 0.2351                        | 88.64              | 6.78   |
| <b>KRT5</b>    | NM_000424    | 60              | 1770           | 2.95%                | 0              | 0.6267                        | 175.64             | 9.83   |
| <b>KEAP1</b>   | NM_012289    | 55              | 1872           | 2.75%                | 0              | 0.6175                        | 152.23             | 17.33  |
| <b>CASP8</b>   | NM_001080125 | 49              | 1614           | 2.54%                | 0              | 0.4025                        | 157.30             | 16.33  |
| <b>CUL3</b>    | NM_001257197 | 41              | 2106           | 2.49%                | 0              | 0.2206                        | 100.87             | 19.50  |
| <b>TGFBR2</b>  | NM_003242    | 47              | 1701           | 2.49%                | 0              | 0.3202                        | 143.16             | 6.71   |
| <b>ZBBX</b>    | NM_001199201 | 38              | 2517           | 2.23%                | 0              | 0.2142                        | 78.22              | 6.33   |
| <b>ATP13A5</b> | NM_198505    | 42              | 3654           | 2.12%                | 0              | 0.2063                        | 59.56              | 6.67   |
| <b>IRF2BPL</b> | NM_024496    | 43              | 2388           | 2.02%                | 1.19E-05       | 0.7992                        | 93.30              | 14.33  |
